# Supplementary material for: Climate change may outpace current wheat breeding yield improvements in North America
Source: PubMed Central journal article supplement (PMC9525655; doi:10.1038/s41467-022-33265-1), 2022-09-30
Supplement: 41467_2022_33265_MOESM1_ESM.pdf [file 41467_2022_33265_MOESM1_ESM.pdf]

# Supplementary Information

## Supplementary Figures

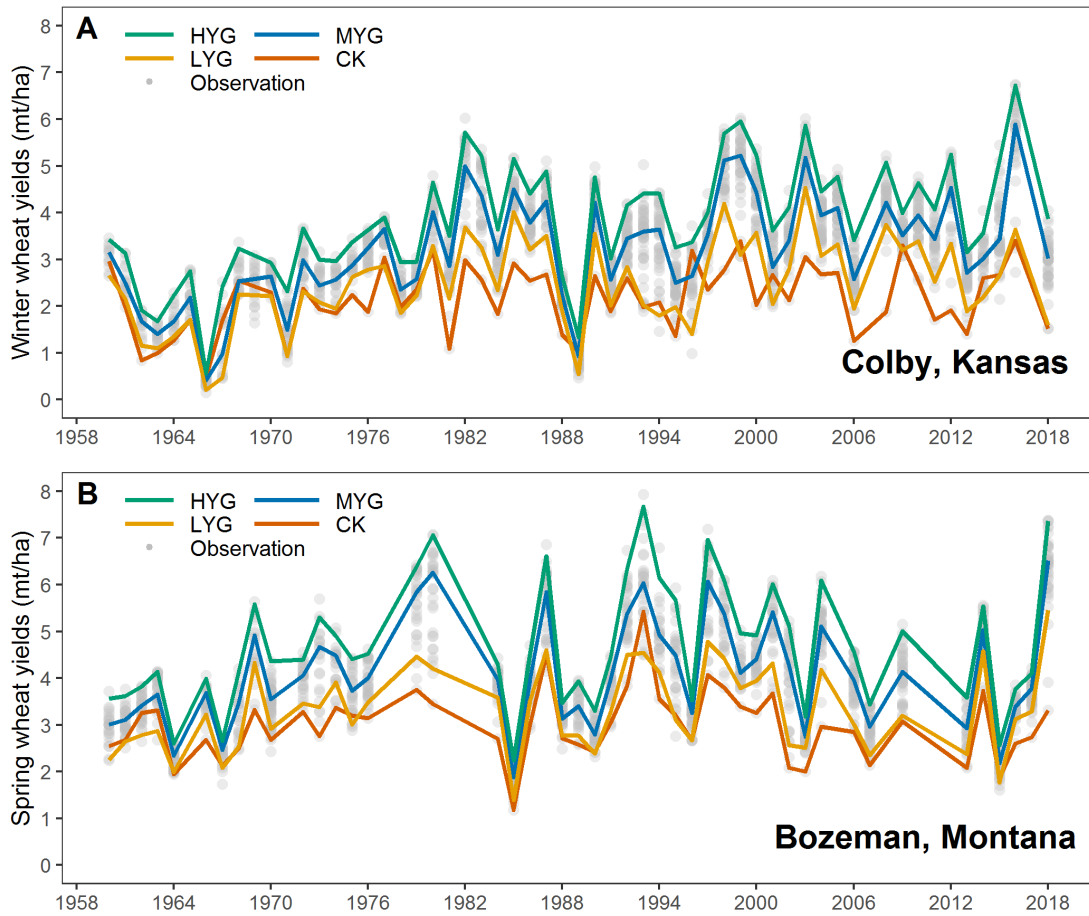

**Supplementary Figure 1. A demonstration of yield time series of wheat yields. A,** Winter wheat yields in Colby Kansas; **B,** Spring wheat yields in Bozeman Montana. The line's color denotes genotypes: high-yielding genotype (HYG); median-yielding genotype (MYG); low-yielding genotype (LYG); check variety (CK). The background data points show the yield observations of each experimental entry in each year.

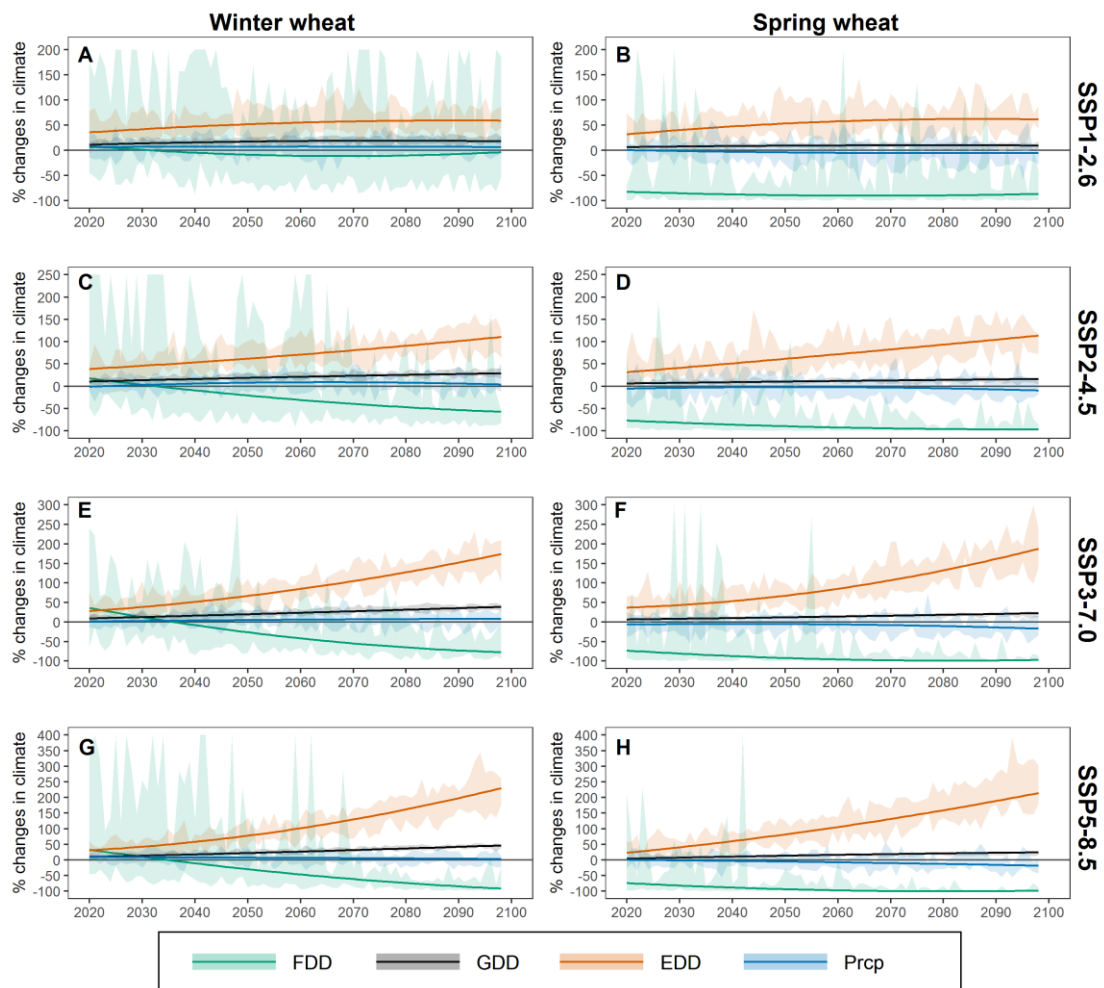

**Supplementary Figure 2. The trend of climate variables simulated by climate models under four SSPs.** The four climate variables are freezing degree-day (FDD), growing-degree-day (GDD), extreme-growing-degree (EDD) and precipitation (Prcp). The left panel shows the climate trends for winter wheat (A, C, E, G) and the right panel (B, D, F, H) shows spring wheat. The first row shows result for the SSP1-2.6 scenario (A, B), the second for SSP2-4.5 (C, D), the third for SSP3-7.0 (E, F) and the fourth for SSP5-8.5 (G, H). The line are the best fit of median changes in each year, and the shading areas show an estimate of the 95% confidence interval from six climate models.

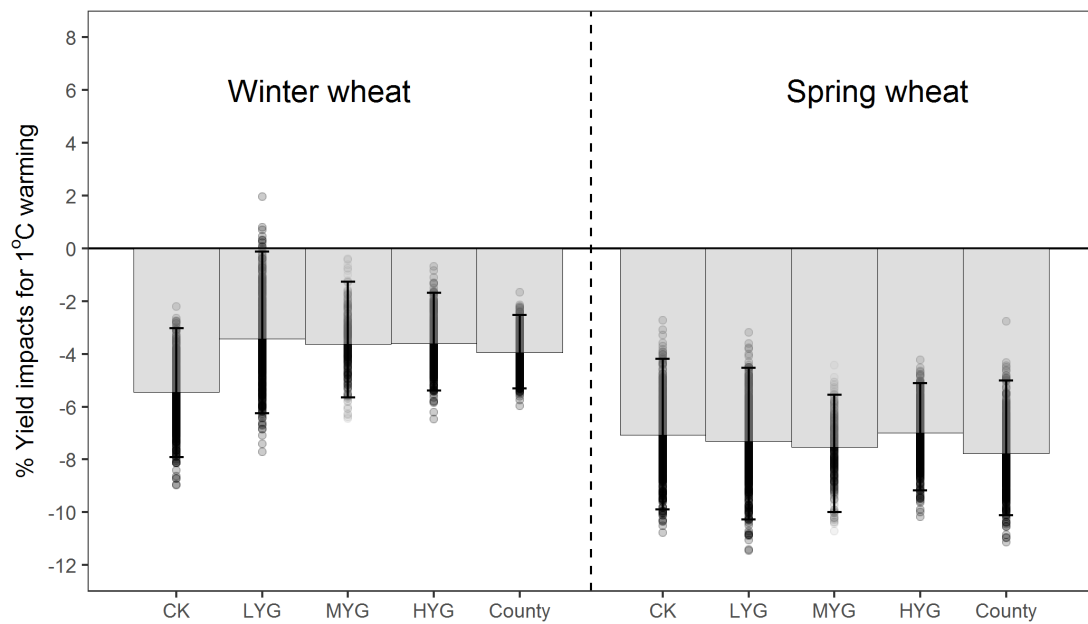

**Supplementary Figure 3. Comparison of model estimates of yield impacts of 1°C warming using regression models for data of nurseries and county-level yield statistics from National Agricultural Statistics Service<sup>1</sup> and Statistics Canada<sup>2</sup>. The centers of error bars denote median yield impact, and the error bars show the 95% confidence interval produced by bootstrapping method (n=1,000). The background data points are the yield impacts for each estimation by bootstrap analysis.**

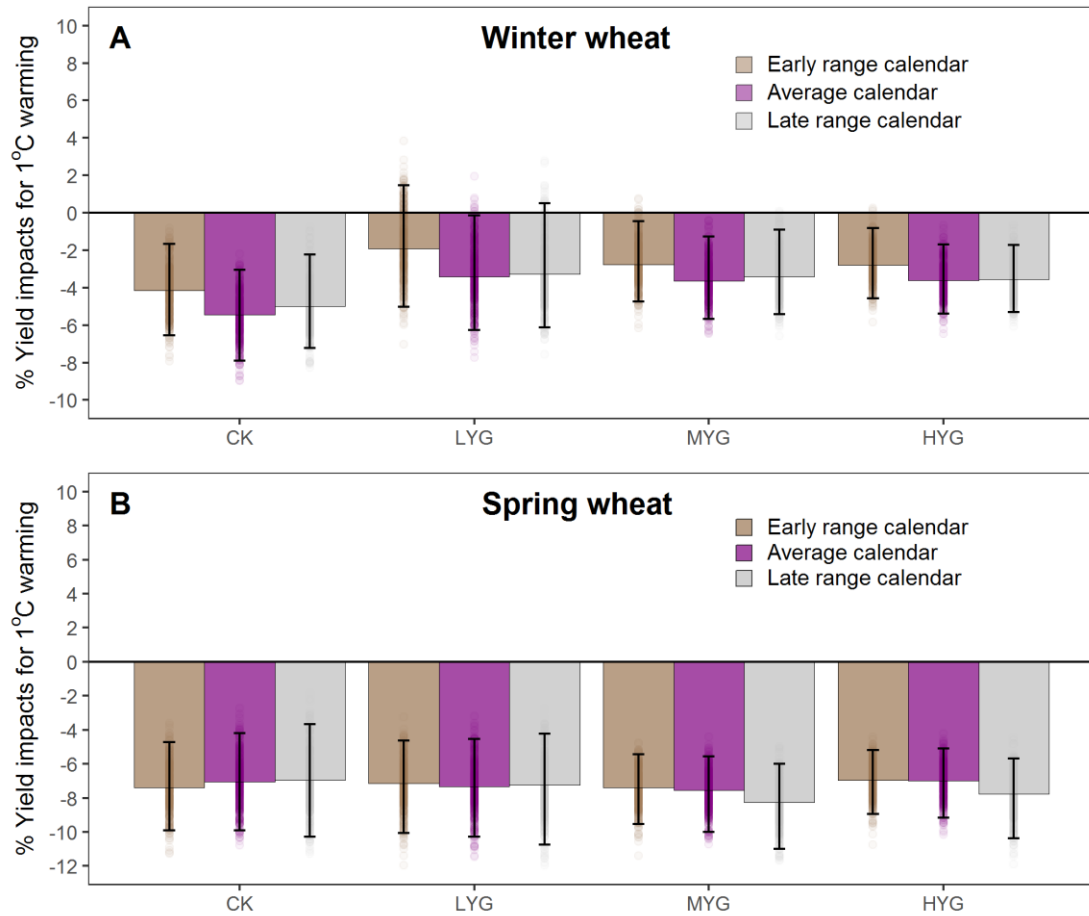

**Supplementary Figure 4. Model estimated yield impact for 1°C warming based on various definitions on growing season. A, results for winter wheat; B, results for spring wheat.** The bar's color denotes various definitions on growing season. We calculated climate variables based on Sacks et al.<sup>3</sup>. The results reported in the main paper is derived from the average planting and harvesting dates in each site (purple bars), and we repeated the analysis based on the lower (yellow bars) and upper (grey bars) range of planting and harvesting time windows. The centers of error bars denote median yield impact, and the error bars show the 95% confidence interval produced by bootstrapping method (n=1,000). The background data points are the yield impacts for each estimation by bootstrap analysis.

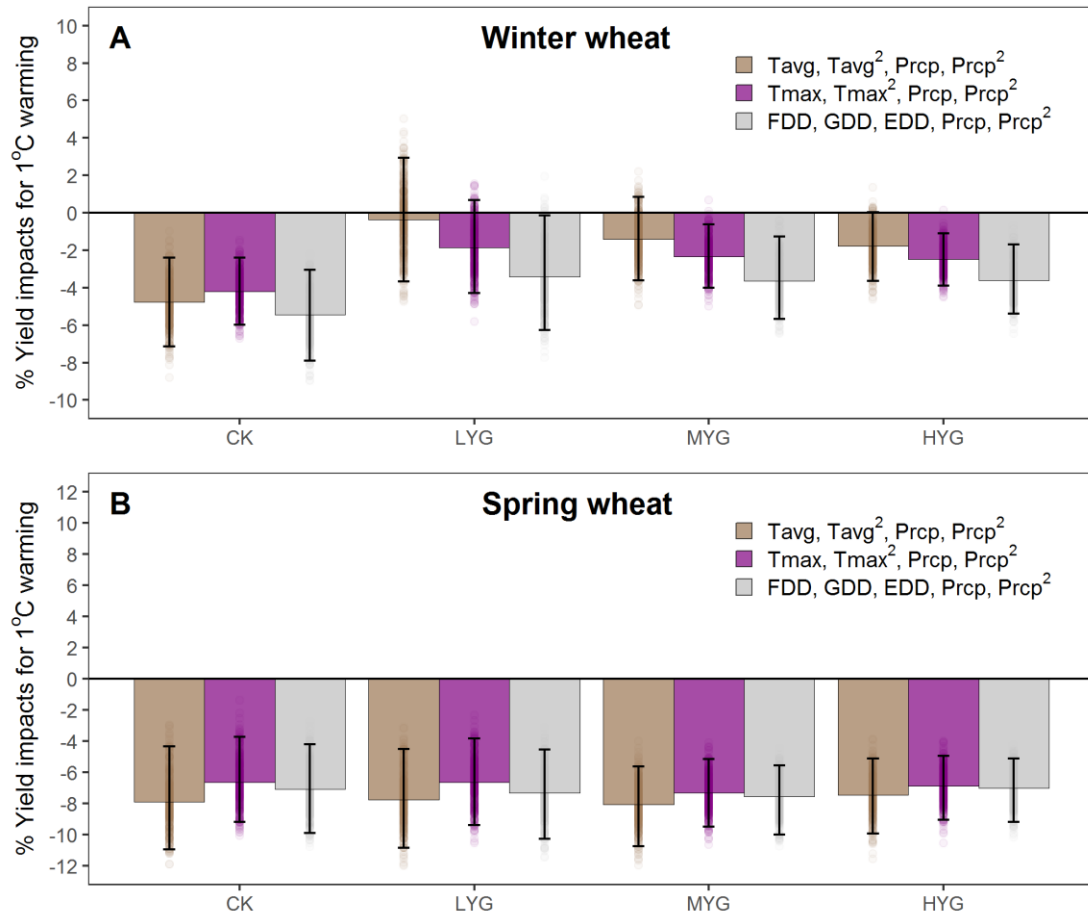

**Supplementary Figure 5. Model estimated yield impact for 1°C warming based on various model specifications. A, results for winter wheat; B, results for spring wheat.** The bar's color denotes various model specifications. The centers of error bars denote median yield impact, and the error bars show the 95% confidence interval produced by bootstrapping method (n=1,000). The background data points are the yield impacts for each estimation by bootstrap analysis. The main results in the paper relate to a model with climate variables: freezing degree-day (FDD), growing-degree-day (GDD), extreme-growing-degree (EDD) and precipitation (Prcp). Results were qualitatively similar when replacing the GDD variables with daily maximum temperature (Tmax) and quadratic term for daily maximum temperature (Tmax<sup>2</sup>) over growing season. However, predicted impacts of warming had greater uncertainties, especially for winter wheat, when the model used daily average temperature (Tavg) and quadratic term for daily average temperature (Tavg<sup>2</sup>). We also conducted the model with daily minimum temperature (Tmin) and quadratic term for daily minimum temperature (Tmin<sup>2</sup>), which returns statistically insignificant results ( $p > 0.05$ ). The regression coefficients in these alternative model specifications can be seen in Supplementary Table 3.

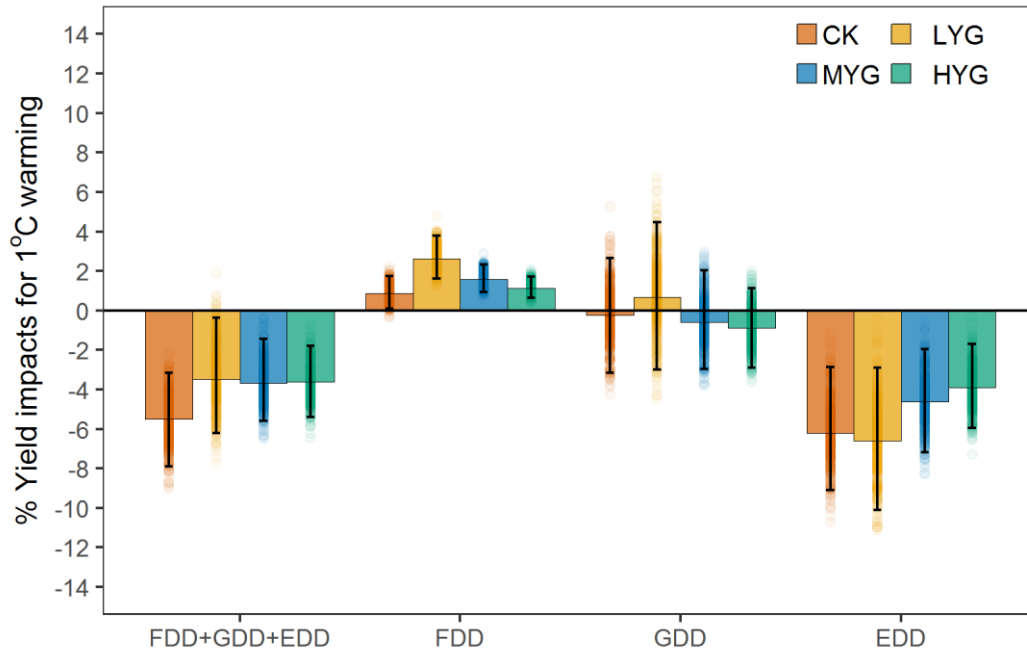

**Supplementary Figure 6. Model estimated yield impact of 1°C warming on the four categories of genotypes of winter wheat but using the temperature thresholds for spring wheat from heading to maturity growing phase (Supplementary Table 4). The bar's color denotes genotypes: high-yielding genotype (HYG); median-yielding genotype (MYG); low-yielding genotype (LYG); check variety (CK). The centers of error bars denote median yield impact, and the error bars show the 95% confidence interval produced by bootstrapping method (n=1,000). The background data points are the yield impacts for each estimation by bootstrap analysis.**

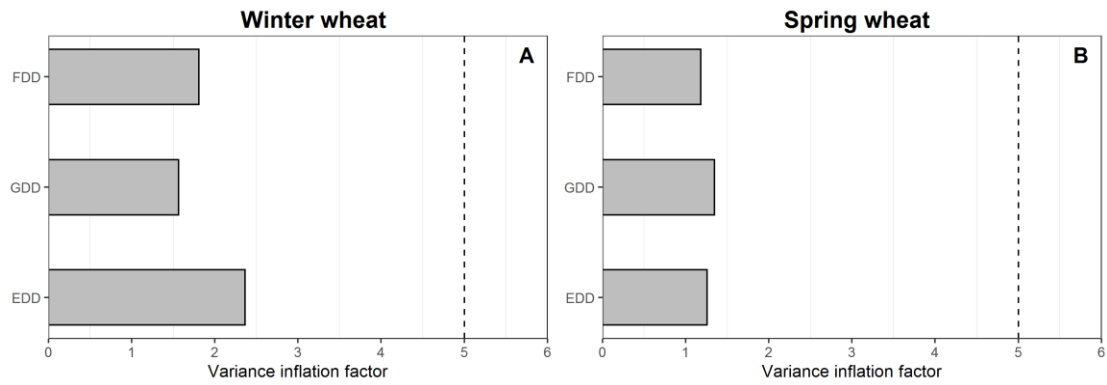

**Supplementary Figure 7. Variance inflation factors of FDD, GDD and EDD. A,** the results for winter wheat data; **B,** the results for spring wheat data. Based on James et al.<sup>4</sup>, regression does not present a serious multicollinearity problem need to be caution if variance inflation factors are less than 5 (dashed line).

### Supplementary Tables

Supplementary Table 1. Regression coefficients of winter and spring wheat. The statistical significance of each climate variable is based on the two-tailed *t*-test. The number in parenthesis is the *p*-value

| Variables         | Winter wheat            |                         |                         |                         | Spring wheat            |                         |                         |                         |
|-------------------|-------------------------|-------------------------|-------------------------|-------------------------|-------------------------|-------------------------|-------------------------|-------------------------|
|                   | CK                      | MYG                     | HYG                     | LYG                     | CK                      | MYG                     | HYG                     | LYG                     |
| FDD               | -3.80e-04<br>(0.0266)   | -6.4e-04<br>(1.15e-05)  | -4.6e-04<br>(1.23e-04)  | -1.05e-03<br>(8.92e-07) | -2.42e-02<br>(0.0021)   | -1.80e-02<br>(0.0035)   | -1.86e-02<br>(0.00108)  | -1.86e-02<br>(0.0181)   |
| GDD               | -5.22e-05<br>(0.7137)   | -7.85e-05<br>(0.5216)   | -1.0e-05<br>(0.3022)    | 3.20e-05<br>(0.8585)    | 4.80e-05<br>(0.8545)    | 1.46e-04<br>(0.478)     | 1.81e-04<br>(0.3386)    | 1.69e-05<br>(0.9486)    |
| EDD               | -6.3e-04<br>(0.000239)  | -4.7e-04<br>(0.00139)   | -4.0e-04<br>(0.00102)   | -6.7e-04<br>(0.00173)   | -1.57e-03<br>(1.12e-06) | -1.74e-03<br>(8.03e-12) | -1.67e-03<br>(1.11e-12) | -1.56e-03<br>(1.39e-06) |
| Prcp              | 2.26e-03<br>(1.68e-11)  | 2.79e-03<br>(1.10e-21)  | 2.48e-03<br>(3.23e-25)  | 2.91e-03<br>(6.64e-12)  | 2.42e-03<br>(8.98e-05)  | 2.87e-03<br>(3.35e-09)  | 2.78e-03<br>(5.67e-10)  | 3.03e-03<br>(9.89e-07)  |
| Prcp <sup>2</sup> | -2.52e-06<br>(6.11e-14) | -2.61e-06<br>(2.32e-19) | -2.21e-06<br>(1.30e-20) | -2.88e-06<br>(9.36e-12) | -5.50e-06<br>(3.87e-08) | -5.37e-06<br>(9.27e-12) | -4.86e-06<br>(2.09e-11) | -6.58e-06<br>(5.90e-11) |



Supplementary Table 2. Estimated yield response to 1°C warming in previous studies

| Regional scale                           | % Yield response to 1°C warming | Estimation method/model | References                       |
|------------------------------------------|---------------------------------|-------------------------|----------------------------------|
| Kansas, USA                              | (-10.0, -1.0)                   | Panel-data model        | Tack et al. <sup>5</sup>         |
| USA                                      | (-7.0, -3.0)                    | Panel-data model        | Lobell et al. <sup>6</sup>       |
| Mexico                                   | (-12.0, -6.9)                   | CERES-Wheat model       | Lobell et al. <sup>7</sup>       |
| Netherlands, Argentina, India, Australia | (-10.0, -5.0)                   | Multiple crop models    | Asseng, et al. <sup>8</sup>      |
| Global                                   | -3.28%                          | Panel-data model        | Wilcox and Makowski <sup>9</sup> |
| Global                                   | -6%                             | Multiple crop models    | Asseng, et al., <sup>10</sup>    |

Supplementary Table 3. Regression coefficients of winter and spring wheat using alternative model specifications. The statistical significance of each climate variable is based on the two-tailed *t*-test. The number in parenthesis is the *p*-value

| Variables         | Winter wheat            |                         |                         |                         | Spring wheat            |                         |                         |                         |
|-------------------|-------------------------|-------------------------|-------------------------|-------------------------|-------------------------|-------------------------|-------------------------|-------------------------|
|                   | CK                      | MYG                     | HYG                     | LYG                     | CK                      | MYG                     | HYG                     | LYG                     |
| Tavg              | 0.065<br>(0.0818)       | 0.046<br>(0.1609)       | 0.027<br>(0.3111)       | 0.103<br>(0.0306)       | 0.0956<br>(0.5393)      | 0.3123<br>(0.0109)      | 0.2536<br>(0.0255)      | 0.378<br>(0.1504)       |
| Tavg <sup>2</sup> | -0.0071<br>(0.00676)    | -0.0037<br>(0.1047)     | -0.00278<br>(0.1353)    | -0.0066<br>(0.0468)     | -0.00477<br>(0.2645)    | -0.0108<br>(0.001339)   | -0.009<br>(0.0038)      | -0.0125<br>(0.00342)    |
| Prcp              | 0.0024<br>(3.36e-13)    | 0.00295<br>(2.45e-24)   | 0.002619<br>(4.83e-28)  | 0.0031<br>(6.02e-14)    | 0.002528<br>(5.06e-05)  | 0.0031<br>(2.83e-10)    | 0.00303<br>(3.54e-11)   | 0.0032<br>(1.93e-07)    |
| Prcp <sup>2</sup> | -2.58e-06<br>(1.35e-14) | -2.68e-06<br>(4.22e-20) | -2.27e-06<br>(2.40e-21) | -2.99e-06<br>(1.92e-12) | -5.38e-06<br>(1.33e-07) | -5.42e-06<br>(1.77e-11) | -4.93e-06<br>(4.07e-11) | -6.64e-06<br>(8.03e-11) |
| Tmax              | 0.115<br>(0.0226)       | 0.1098<br>(0.0119)      | 0.0822<br>(0.0357)      | 0.185<br>(0.003838)     | 0.434<br>(0.0055)       | 0.630<br>(2.81e-07)     | 0.505<br>(8.40e-06)     | 0.820<br>(1.40e-07)     |
| Tmax <sup>2</sup> | -0.0052<br>(0.00313)    | -0.0044<br>(0.00395)    | -0.00354<br>(0.00455)   | -0.00675<br>(0.002559)  | -0.00983<br>(0.00157)   | -0.0138<br>(1.33e-08)   | -0.0113<br>(5.24e-07)   | -0.01744<br>(1.71e-08)  |
| Prcp              | 0.0022<br>(3.87e-11)    | 0.00281<br>(1.95e-21)   | 0.002478<br>(1.41e-24)  | 0.002991<br>(3.33e-12)  | 0.002059<br>(0.00133)   | 0.00242<br>(1.39e-06)   | 0.002386<br>(2.88e-07)  | 0.002598<br>(4.26e-05)  |
| Prcp <sup>2</sup> | -2.46e-06<br>(2.89e-13) | -2.58e-06<br>(1.51e-18) | -2.17e-06<br>(1.23e-19) | -2.85e-06<br>(2.30e-11) | -4.86e-06<br>(2.21e-06) | -4.58e-06<br>(1.05e-08) | -4.17e-06<br>(1.92e-08) | -5.79e-06<br>(1.20e-08) |
| Tmin              | -0.021<br>(0.1063)      | 0.0122<br>(0.2778)      | 0.0040<br>(0.6621)      | 0.0353<br>(0.0321)      | -0.1046<br>(0.2486)     | -0.053<br>(0.465)       | -0.0544<br>(0.4158)     | -0.0726<br>(0.422)      |

|                   |                         |                         |                         |                         |                         |                         |                         |                         |
|-------------------|-------------------------|-------------------------|-------------------------|-------------------------|-------------------------|-------------------------|-------------------------|-------------------------|
| Tmin <sup>2</sup> | -0.00539<br>(0.0544)    | -0.00081<br>(0.7381)    | -0.00046<br>(0.81739)   | -0.00216<br>(0.5422)    | 0.00112<br>(0.7766)     | -0.00098<br>(0.7555)    | -0.00049<br>(0.866)     | -0.00032<br>(0.9363)    |
| Prcp              | 0.00254<br>(1.42e-14)   | 0.00298<br>(3.69e-25)   | 0.002668<br>(1.86e-29)  | 0.003133<br>(6.43e-14)  | 0.00304<br>(4.88e-07)   | 0.0036<br>(1.13e-13)    | 0.0035<br>(7.38e-15)    | 0.00364<br>(1.91e-09)   |
| Prcp <sup>2</sup> | -5.32e-06<br>(5.32e-15) | -2.70e-06<br>(2.34e-20) | -2.30e-06<br>(8.09e-22) | -2.97e-06<br>(2.26e-12) | -5.78e-06<br>(9.96e-09) | -5.76e-06<br>(9.01e-13) | -5.28e-06<br>(1.63e-12) | -6.85e-06<br>(1.27e-11) |

Supplementary Table 4. The base and optimum growing temperature in each phenological phases for winter and spring wheat. The threshold is based on Narciso et al.<sup>11</sup>; Shroyer et al.<sup>12</sup>, Porter and Gawith<sup>13</sup>, Tack et al.<sup>5</sup> and Saiyed et al.<sup>14</sup>.

| Wheat           | Month | Growing phases           | T <sub>frez</sub> (°C) | T <sub>base</sub> (°C) | T <sub>opt</sub> (°C) |
|-----------------|-------|--------------------------|------------------------|------------------------|-----------------------|
| Winter<br>wheat | Sep   | Planting                 | 0.0                    | 3.0                    | 7.5                   |
|                 | Oct   | Vegetative               | 0.0                    | 3.0                    | 7.5                   |
|                 | Nov   | Hardening                | -5.0                   | 3.0                    | 7.5                   |
|                 | Dec   | Dormant                  | -11.0                  | 0.0                    | 5.0                   |
|                 | Jan   | Dormant                  | -11.0                  | 0.0                    | 5.0                   |
|                 | Feb   | Dormant                  | -11.0                  | 0.0                    | 5.0                   |
|                 | Mar   | Vegetative               | -4.0                   | 1.5                    | 10.6                  |
|                 | Apr   | Jointing                 | -4.0                   | 5.0                    | 18.5                  |
|                 | May   | Heading                  | -1.0                   | 5.0                    | 20.0                  |
|                 | Jun   | Filling                  | -2.2                   | 5.0                    | 20.7                  |
|                 | Jul   | Maturity                 | -2.2                   | 5.0                    | 23.5                  |
| Spring<br>Wheat | April | Planting                 | -8.0                   | 3.0                    | 7.5                   |
|                 | May   | Tillering                | 0.0                    | 3.0                    | 10.6                  |
|                 | Jun   | Tillering-Heading        | 0.0                    | 5.0                    | 20.0                  |
|                 | Jul   | Heading-Grain filling    | -2.2                   | 5.0                    | 20.0                  |
|                 | Aug   | Grain filling - Maturity | -2.2                   | 5.0                    | 23.5                  |

Supplementary Table 5. The meteorological site ID number used in Northern Regional Performance Nursery (NRPN)

| <b>Nursery</b> | <b>Country</b>      | <b>State</b> | <b>Site</b>  | <b>ID number</b> |
|----------------|---------------------|--------------|--------------|------------------|
| NRPN           | Canada <sup>1</sup> | Alberta      | Lethbridge   | Lethbridge       |
|                | USA <sup>2</sup>    | Idaho        | Aberdeen     | USC00100010      |
|                | USA                 | Idaho        | Tetonia      | USC00109065      |
|                | USA                 | Iowa         | Ames         | USC00130200      |
|                | USA                 | Minnesota    | Rosemount    | USC00217107      |
|                | USA                 | Minnesota    | Waseca       | USC00218692      |
|                | USA                 | Montana      | Bozeman      | USC00241044      |
|                | USA                 | Montana      | Moccasin     | USC00245761      |
|                | USA                 | Nebraska     | Alliance     | USC00250130      |
|                | USA                 | Nebraska     | Lincoln      | USC00254790      |
|                | USA                 | Nebraska     | Mead         | USC00255362      |
|                | USA                 | Nebraska     | North Platte | USC00256075      |
|                | USA                 | Nebraska     | Sidney       | USC00257830      |
|                | USA                 | New Mexico   | Clovis       | USC00291939      |
|                | USA                 | North Dakota | Carrington   | USC00321360      |
|                | USA                 | North Dakota | Casselton    | USC00321408      |
|                | USA                 | North Dakota | Hettinger    | USC00324178      |
|                | USA                 | North Dakota | Williston    | USC00329430      |
|                | USA                 | South Dakota | Brookings    | USC00391076      |
|                | USA                 | South Dakota | Highmore     | USC00393838      |
|                | USA                 | South Dakota | Presho       | USC00396790      |
|                | USA                 | South Dakota | Winner       | USC00399367      |
|                | USA                 | Wyoming      | Archer       | USC00480270      |
|                | USA                 | Wyoming      | Sheridan     | USC00488160      |

<sup>1</sup> Data from MSC<sup>15</sup>

<sup>2</sup> Data from GHCND<sup>16</sup>

Supplementary Table 6. The meteorological site ID number used in Southern Regional Performance Nursery (SRPN)

| <b>Nursery</b> | <b>Country</b>   | <b>State</b> | <b>Site</b>   | <b>ID number</b> |
|----------------|------------------|--------------|---------------|------------------|
| SRPN           | USA <sup>1</sup> | Colorado     | Akron         | USC00050109      |
|                | USA              | Colorado     | Burlington    | USC00051121      |
|                | USA              | Colorado     | Ft. Collins   | USC00053005      |
|                | USA              | Colorado     | Julesburg     | USC00054413      |
|                | USA              | Colorado     | Springfield   | USC00057866      |
|                | USA              | Colorado     | Walsh         | USC00058793      |
|                | USA              | Colorado     | Yellow Jacket | USC00059275      |
|                | USA              | Idaho        | Aberdeen      | USC00100010      |
|                | USA              | Illinois     | Urbana        | USC00118740      |
|                | USA              | Iowa         | Ames          | USC00130200      |
|                | USA              | Kansas       | Cloby         | USC00141699      |
|                | USA              | Kansas       | Garden City   | USC00142980      |
|                | USA              | Kansas       | HAYS          | USC00143527      |
|                | USA              | Kansas       | Hutchinson    | USC00143930      |
|                | USA              | Kansas       | Manhattan     | USC00144972      |
|                | USA              | Kansas       | Winfield      | USC00148964      |
|                | USA              | Missouri     | Columbia      | USW00003945      |
|                | USA              | Montana      | Bozeman       | USC00241044      |
|                | USA              | Nebraska     | Alliance      | USC00250130      |
|                | USA              | Nebraska     | Clay Center   | USC00251680      |
|                | USA              | Nebraska     | Hemingford    | USC00253755      |
|                | USA              | Nebraska     | Lincoln       | USC00254790      |
|                | USA              | Nebraska     | Mead          | USC00255362      |
|                | USA              | Nebraska     | North Platte  | USC00256075      |
|                | USA              | Nebraska     | Sidney        | USC00257830      |
|                | USA              | New Mexico   | Clovis        | USC00291963      |
|                | USA              | New Mexico   | Farmington    | USC00293142      |
|                | USA              | Oklahoma     | Altus         | USC00340184      |
|                | USA              | Oklahoma     | Cherokee      | USC00341724      |
|                | USA              | Oklahoma     | Goodwell      | USC00343628      |
|                | USA              | Oklahoma     | Lahoma        | USC00344950      |
|                | USA              | Oklahoma     | Stillwater    | USC00348501      |
|                | USA              | Oklahoma     | Woodward      | USC00349760      |
|                | USA              | South Dakota | Brookings     | USC00391076      |

|     |              |          |             |
|-----|--------------|----------|-------------|
| USA | South Dakota | Highmore | USC00393838 |
| USA | South Dakota | Presho   | USC00396790 |
| USA | South Dakota | Winner   | USC00399367 |
| USA | Texas        | Bushland | USC00411267 |

---

<sup>1</sup> Data from GHCND<sup>16</sup>

Supplementary Table 7. The meteorological site ID number used in Hard Red Spring Wheat Uniform Regional Nursery (HRSWURN)

| <b>Nursery</b> | <b>Country</b>      | <b>State</b> | <b>Site</b>   | <b>ID number</b> |
|----------------|---------------------|--------------|---------------|------------------|
| HRSWURN        | Canada <sup>1</sup> | Manitoba     | Winnipeg      | Winnipeg         |
|                | Canada              | Saskatchewan | Saskatoon     | Saskatoon        |
|                | Canada              | Saskatchewan | Swift Current | Swift Current    |
|                | USA <sup>2</sup>    | Idaho        | Aberdeen      | USC00100010      |
|                | USA                 | Idaho        | Tetonia       | USC00109065      |
|                | USA                 | Minnesota    | Crookston     | USC00211891      |
|                | USA                 | Minnesota    | Morris        | USC00215638      |
|                | USA                 | Minnesota    | Saint Paul    | USC00218450      |
|                | USA                 | Montana      | Bozeman       | USC00241044      |
|                | USA                 | Montana      | Havre         | USW00094012      |
|                | USA                 | Montana      | Sidney        | USC00247560      |
|                | USA                 | Nebraska     | Mead          | USC00255362      |
|                | USA                 | North Dakota | Carrington    | USC00321360      |
|                | USA                 | North Dakota | Casselton     | USC00321408      |
|                | USA                 | North Dakota | Fargo         | USW00014914      |
|                | USA                 | North Dakota | Hettinger     | USC00324178      |
|                | USA                 | North Dakota | Langdon       | USC00324958      |
|                | USA                 | North Dakota | Minot         | USC00325993      |
|                | USA                 | North Dakota | Williston     | USC00329420      |
|                | USA                 | South Dakota | Brookings     | USC00391076      |
|                | USA                 | South Dakota | Highmore      | USC00393832      |
|                | USA                 | South Dakota | Redfield      | USC00397052      |
|                | USA                 | South Dakota | Selby         | USC00397545      |
|                | USA                 | South Dakota | Watertown     | USW00014946      |
|                | USA                 | Washington   | Lind          | USC00454679      |
|                | USA                 | Washington   | Pullman       | USC00456789      |
|                | USA                 | Wisconsin    | Madison       | USW00014837      |
|                | USA                 | Wyoming      | Powell        | USC00487388      |
|                | USA                 | Wyoming      | Sheridan      | USC00488160      |
|                | USA                 | Wyoming      | Torrington    | USC00488995      |

<sup>1</sup> Data from MSC<sup>15</sup>

<sup>2</sup> Data from GHCND<sup>16</sup>



Supplementary Table 8. Climate models used in the study

| <u>Climate models</u> | <u>Model sources</u> | <u>Release year</u> |
|-----------------------|----------------------|---------------------|
| ACCESS-ESM1-5         | CSIRO                | 2019                |
| BCC-CSM2-MR           | BCC                  | 2017                |
| CNRM-CM6-1            | CNRM-CERFACS         | 2017                |
| CNRM-ESM2-1           | CNRM-CERFACS         | 2017                |
| GFDL-ESM4             | NOAA-GFDL            | 2018                |
| IPSL-CM6A-LR          | IPSL                 | 2017                |

## Supplementary References

1. National agricultural Statistics Service. Available at <https://quickstats.nass.usda.gov> (verified 29 April 2022).
2. Statistics Canada. Available at <https://www.statcan.gc.ca/eng/start> (verified 29 April 2022).
3. Sacks, W. , Deryng, D., Foley, J., & Ramankutty, N. Crop planting dates: an analysis of global patterns. *Glob. Ecol. Biogeogr.* **19**, 607–620 (2010).
4. James, G., Witten, D., Hastie, T. & Tibshirani R. An Introduction to Statistical Learning: With Applications in R. 1st ed. 2013, Corr. 7th printing 2017 edition. Springer; (2013).
5. Tack, J., Barkley, A. & Nalley, L. Effect of warming temperatures on US wheat yields. *Proc. Natl. Acad. Sci. U.S.A.* **112**, 6931–6936. (2015).
6. Lobell, D., Schlenker, W., & Costa-Roberts, J. Climate trends and global crop production since 1980. *Science.* **333**, 616 (2011).
7. Lobell, D., & Ivan Ortiz-Monasterio, J. Impacts of day versus night temperatures on spring wheat yields: A comparison of empirical CERES model predictions in Three locations. *Agron. J.* **99**, 469–477(2007).
8. Asseng, S. et al. Uncertainty in simulating wheat yields under climate change. *Nat. Clim. Change* **9**, 827–832 (2013).
9. Wilcox, J. & Makowski, D. A meta-analysis of the predicted effects of climate change on wheat yields using simulation studies. *Field Crop Res.* **156**, 180–190 (2013).
10. Asseng, S. et al. Rising temperatures reduce global wheat production. *Nat. Clim. Change*, **5**, 143–147. (2015).
11. Narciso, G., Ragni, P. & Venturi, A., Agrometeorological Aspects of crops in Italy, Spain and Greece. Joint Research Centre, Commission of the European Communities, Brussels–Luxembourg (1992).
12. Shroyer, J., Mikesell, M. & Paulsen, G., Spring freeze injury to Kansas wheat. Agricultural Experiment Station and Cooperative Extension Service (1995).
13. Porter, J. & Gawith, M., Temperatures and the growth and development of wheat: a review. *Euro. J. of Agron.* **10**, 23–36 (1999).
14. Saiyed, M., Bullock, R., Sapirstein, D., Finlay, J. & Jarvis, K. Thermal time models for estimating wheat phenological development and weather-based relationships to wheat quality. *Can. J. Plant Sci.* **89**, 429–439 (2009).
15. MSC. Meteorological Service of Canada. Available at <https://climate.weather.gc.ca/> (verified 17 July 2021).
16. Menne, M., Durre, I., Vose, R., Gleason, B. & Houston, T. An overview of the Global Historical Climatology Network-Daily Database. *J. Atmos. Ocean*

*Technol.*, **29**, 897–910 (2012).
